# Supplementary material for: Mechanistic Insight into Royal Protein Inhibiting the Gram-Positive Bacteria
Source: Biomolecules. 2021 Jan 6;11(1):64. doi: 10.3390/biom11010064 (PMC7825125; doi:10.3390/biom11010064)
Supplement: Supplementary file 1 [file biomolecules-11-00064-s001.zip › Table S1.xlsx]

## Sheet: Table S1-1
Table S1-1. Membrane protein identification of Paenibacillus larvae.
Protein Group	Accession	-10lgP	Coverage (%)	#Peptides	#Unique	PTM	Avg. Mass	Description	Predicted as membrane protein?	TMHMM	PHOBIUS		PSORTB	PRED-LIPO	interProscan
											TM	SP
75	gi|558473824	125.37	29	24	24	Oxidation (M)	103716	membrane carboxypeptidase-like protein [Paenibacillus larvae]	Y	PredHel=1	1	0	CytoplasmicMembrane	Membrane
75	gi|568325832	125.37	29	24	24	Oxidation (M)	103704	penicillin-binding protein 1A [Paenibacillus larvae]	Y	PredHel=1	1	0	CytoplasmicMembrane	Membrane
91	gi|738762300	39.98	4	2	2		65753	multidrug ABC transporter ATP-binding protein [Paenibacillus larvae]	Y	PredHel=0	6	0	CytoplasmicMembrane	Membrane
142	gi|738760790	171.49	25	14	13	Oxidation (M)	57823	ribonuclease Y [Paenibacillus larvae]	Y	PredHel=0	1	0	Cytoplasmic	Membrane
162	gi|558473011	197.18	28	17	17	Carbamidomethylation; Oxidation (M)	75753	hypothetical protein [Paenibacillus larvae]	Y	PredHel=2	2	0	CytoplasmicMembrane	Membrane
203	gi|738762252	105.04	5	2	2		39080	PIN/TRAM domain-containing protein [Paenibacillus larvae]	Y	PredHel=0	3	Y	CytoplasmicMembrane	Signal
216	gi|568324482	71.67	14	7	7	Oxidation (M)	72268	potassium-transporting ATPase B chain KdpB [Paenibacillus larvae]	Y	PredHel=7	7	0	CytoplasmicMembrane	Membrane
226	gi|558476232	125.51	13	9	9	Oxidation (M)	62381	methyl-accepting chemotaxis-like protein [Paenibacillus larvae]	Y	PredHel=1	1	Y	CytoplasmicMembrane	Membrane
229	gi|558473530	66.81	5	11	11	Oxidation (M)	319464	hypothetical protein [Paenibacillus larvae]	Y	PredHel=6	7	0	CytoplasmicMembrane	Cytoplasmic
229	gi|568325266	66.81	5	11	11	Oxidation (M)	319480	glycosyltransferase family 36 protein [Paenibacillus larvae]	Y	PredHel=6	7	0	CytoplasmicMembrane	Cytoplasmic
249	gi|738764059	49.53	6	2	2		51230	peptidase S41 [Paenibacillus larvae]	Y	PredHel=0	0	Y	CytoplasmicMembrane	Signal
249	gi|754754857	49.53	6	2	2		51260	peptidase S41 [Paenibacillus larvae]	Y	PredHel=0	0	Y	CytoplasmicMembrane	Signal
329	gi|558474182	56.11	5	3	3	Oxidation (M)	52191	protein associated with the phosphotransferase system [Paenibacillus larvae]	Y	PredHel=10	10	0	CytoplasmicMembrane	Cytoplasmic
329	gi|568326553	56.11	5	3	3	Oxidation (M)	52210	PTS N-acetylglucosamine IIBC component [Paenibacillus larvae]	Y	PredHel=10	10	0	CytoplasmicMembrane	Cytoplasmic
367	gi|558475605	71.14	24	9	9	Oxidation (M)	44398	glycine/betaine ABC transporter [Paenibacillus larvae]	Y	PredHel=0	0	0	CytoplasmicMembrane	Membrane
377	gi|568324813	41.24	8	3	3		69250	ABC transporter ATP-binding protein [Paenibacillus larvae]	Y	PredHel=5	5	0	CytoplasmicMembrane	Membrane
377	gi|738762034	41.24	8	3	3		69229	ABC transporter [Paenibacillus larvae]	Y	PredHel=0	5	0	CytoplasmicMembrane	Membrane
389	gi|568326592	37.64	4	2	2	Oxidation (M)	89463	histidine kinase [Paenibacillus larvae]	Y	PredHel=11	10	0	CytoplasmicMembrane	Membrane
389	gi|738761974	37.64	4	2	2	Oxidation (M)	89454	hypothetical protein [Paenibacillus larvae]	Y	PredHel=2	10	0	CytoplasmicMembrane	Membrane
430	gi|558473320	52.48	8	3	3		43380	germination protein [Paenibacillus larvae]	Y	PredHel=0	0	Y	CytoplasmicMembrane	Lipoprotein
479	gi|558473173	50.58	2	2	2		43412	membrane serine protease-like protein Do [Paenibacillus larvae]	Y	PredHel=1	1	0	Cytoplasmic	Membrane
479	gi|568324397	50.58	2	2	2		43378	serine protease [Paenibacillus larvae]	Y	PredHel=1	1	0	Cytoplasmic	Membrane
486	gi|738762487	42.94	9	2	2		34160	cell division protein FtsX [Paenibacillus larvae]	Y	PredHel=0	4	0	CytoplasmicMembrane	Membrane
510	gi|568325120	58.54	6	6	6	Oxidation (M)	124421	hypothetical protein [Paenibacillus larvae]	Y	PredHel=1	3	0	CytoplasmicMembrane	Cytoplasmic
517	gi|738764063	45.62	6	2	2	Oxidation (M)	51839	ABC transporter [Paenibacillus larvae]	Y	PredHel=1	1	Y	Unknown	Membrane
517	gi|754755405	45.62	6	2	2	Oxidation (M)	51851	ABC transporter [Paenibacillus larvae]	Y	PredHel=7	1	Y	Unknown	Membrane
520	gi|558474877	46.9	8	4	4		54979	flotillin [Paenibacillus larvae]	Y	PredHel=1	1	0	CytoplasmicMembrane	Membrane
554	gi|738763483	100.81	9	5	5	Carbamidomethylation; Oxidation (M)	82346	hypothetical protein [Paenibacillus larvae]	Y	PredHel=0	6	0	CytoplasmicMembrane	Membrane
554	gi|754754345	100.81	9	5	5	Carbamidomethylation; Oxidation (M)	82334	hypothetical protein [Paenibacillus larvae]	Y	PredHel=0	6	0	CytoplasmicMembrane	Membrane
606	gi|738765442	35.33	7	2	2	Oxidation (M)	51836	two-component sensor histidine kinase [Paenibacillus larvae]	Y	PredHel=1	2	0	CytoplasmicMembrane	Membrane
620	gi|558473485	47.53	9	3	3		57791	hypothetical protein [Paenibacillus larvae]	Y	PredHel=1	1	0	CytoplasmicMembrane	Membrane
620	gi|754754286	47.53	9	3	3		57776	ATPase [Paenibacillus larvae]	Y	PredHel=0	1	0	CytoplasmicMembrane	Membrane
666	gi|558475107	45.06	11	3	3	Oxidation (M)	57591	lipoprotein-like protein [Paenibacillus larvae]	Y	PredHel=1	0	Y	Unknown	Lipoprotein
666	gi|568326351	45.06	11	3	3	Oxidation (M)	57577	lipoprotein-like protein [Paenibacillus larvae]	Y	PredHel=1	0	Y	Unknown	Lipoprotein
674	gi|919197473	62.93	4	4	4	Oxidation (M)	93387	phage tail tape measure protein [Paenibacillus larvae]	Y	PredHel=0	2	0	CytoplasmicMembrane	Cytoplasmic
702	gi|558475687	57.61	8	6	6	Oxidation (M)	86628	copper transporter ATPase-like protein [Paenibacillus larvae]	Y	PredHel=5	8	0	CytoplasmicMembrane	Cytoplasmic
710	gi|738762383	86.77	6	3	3		73382	hypothetical protein [Paenibacillus larvae]	Y	PredHel=6	1	0	CytoplasmicMembrane	Membrane
710	gi|750648713	86.77	6	3	3		73413	hypothetical protein [Paenibacillus larvae]	Y	PredHel=0	0	0	CytoplasmicMembrane	Membrane
711	gi|558476220	41.68	4	3	3		115468	hypothetical protein [Paenibacillus larvae]	Y	PredHel=12	12	0	CytoplasmicMembrane	Membrane
711	gi|568324596	41.68	4	3	3		115359	hypothetical protein [Paenibacillus larvae]	Y	PredHel=12	12	0	CytoplasmicMembrane	Membrane
787	gi|558476389	55.15	9	5	5		83831	penicillin-binding protein [Paenibacillus larvae]	Y	PredHel=1	0	Y	CytoplasmicMembrane	Membrane
787	gi|738761506	55.15	9	5	5		83847	hypothetical protein [Paenibacillus larvae]	Y	PredHel=0	0	Y	CytoplasmicMembrane	Membrane
803	gi|916820903	57.49	11	3	3		24416	hypothetical protein [Paenibacillus larvae]	Y	PredHel=0	1	0	CytoplasmicMembrane	Membrane
847	gi|558473181	31.35	15	2	2		13611	hypothetical protein [Paenibacillus larvae]	Y	PredHel=1	1	0	Unknown	Membrane
874	gi|568325981	41.92	13	4	4	Carbamidomethylation	52604	two-component sensor histidine kinase [Paenibacillus larvae]	Y	PredHel=2	2	0	CytoplasmicMembrane	Membrane
874	gi|738761534	41.92	13	4	4	Carbamidomethylation	52586	two-component sensor histidine kinase [Paenibacillus larvae]	Y	PredHel=0	2	0	CytoplasmicMembrane	Membrane
878	gi|558476388	45.71	5	4	4		71234	stage V sporulation protein D [Paenibacillus larvae]	Y	PredHel=1	0	Y	CytoplasmicMembrane	Cytoplasmic
883	gi|558474421	61.08	8	6	6	Oxidation (M)	94409	hypothetical protein [Paenibacillus larvae]	Y	PredHel=8	7	Y	CytoplasmicMembrane	Membrane
883	gi|568326019	61.08	8	6	6	Oxidation (M)	95151	hypothetical protein [Paenibacillus larvae]	Y	PredHel=8	7	Y	CytoplasmicMembrane	Membrane
920	gi|754754533	35.08	6	2	2		38975	hypothetical protein [Paenibacillus larvae]	Y	PredHel=0	1	0	Cytoplasmic	Cytoplasmic
921	gi|558475386	34.01	4	2	2		45323	C4-dicarboxylate transporter DctA-like protein [Paenibacillus larvae]	Y	PredHel=8	8	0	CytoplasmicMembrane	Membrane
928	gi|568326400	27.95	5	2	2		35545	hypothetical protein [Paenibacillus larvae]	Y	PredHel=1	1	0	Unknown	Membrane
977	gi|738761968	44.56	8	3	3		67773	PAS domain-containing sensor histidine kinase [Paenibacillus larvae]	Y	PredHel=0	1	Y	CytoplasmicMembrane	Membrane
977	gi|754754733	44.56	8	3	3		67769	PAS domain-containing sensor histidine kinase [Paenibacillus larvae]	Y	PredHel=0	1	Y	CytoplasmicMembrane	Membrane
977	gi|918011862	44.56	8	3	3		65768	PAS domain-containing sensor histidine kinase [Paenibacillus larvae]	Y	PredHel=0	1	0	CytoplasmicMembrane	Cytoplasmic
981	gi|558473790	73.18	8	4	4		76579	protein kinase-like protein [Paenibacillus larvae]	Y	PredHel=1	1	0	CytoplasmicMembrane	Cytoplasmic
981	gi|568325808	73.18	8	4	4		76611	serine/threonine-protein kinase PrkC [Paenibacillus larvae]	Y	PredHel=1	1	0	CytoplasmicMembrane	Cytoplasmic
993	gi|918159676	54.21	9	4	4	Carbamidomethylation	71972	two-component sensor histidine kinase [Paenibacillus larvae]	Y	PredHel=2	2	0	CytoplasmicMembrane	Membrane
997	gi|558473117	33.62	5	2	2		79128	methyl-accepting-like protein [Paenibacillus larvae]	Y	PredHel=6	6	0	CytoplasmicMembrane	Membrane
1017	gi|558474263	60.17	4	2	2		73131	cytochrome ubiquinol oxidase subunit I [Paenibacillus larvae]	Y	PredHel=14	15	0	CytoplasmicMembrane	Membrane
1097	gi|738763037	46.12	4	5	5		131257	phage tail tape measure protein [Paenibacillus larvae]	Y	PredHel=0	8	0	CytoplasmicMembrane	Cytoplasmic
1097	gi|971482324	46.12	4	5	5		131287	tail tape-measure protein [Paenibacillus phage Harrison]	Y	PredHel=0	8	0	CytoplasmicMembrane	Cytoplasmic
1097	gi|971741592	46.12	4	5	5		131287	tail tape-measure protein [Paenibacillus phage Vegas]	Y	PredHel=0	8	0	CytoplasmicMembrane	Cytoplasmic
1104	gi|558473177	34.89	7	3	3	Oxidation (M)	68577	PAS domain-containing sensor histidine kinase [Paenibacillus larvae]	Y	PredHel=2	2	0	CytoplasmicMembrane	Membrane
1109	gi|754755183	40.55	9	4	4	Carbamidomethylation; Oxidation (M)	69428	hypothetical protein [Paenibacillus larvae]	Y	PredHel=0	0	Y	Unknown	Membrane
1109	gi|817691513	40.55	9	4	4	Carbamidomethylation; Oxidation (M)	69441	hypothetical protein [Paenibacillus larvae]	Y	PredHel=0	0	Y	Unknown	Membrane
1109	gi|916821006	40.55	9	4	4	Carbamidomethylation; Oxidation (M)	69469	hypothetical protein [Paenibacillus larvae]	Y	PredHel=0	0	Y	Unknown	Membrane
1121	gi|568326328	37.16	7	3	3	Oxidation (M)	73122	methyl-accepting chemotaxis protein McpC [Paenibacillus larvae]	Y	PredHel=2	2	0	CytoplasmicMembrane	Membrane
1139	gi|558473348	54.09	26	5	5		30081	methionine ABC transporter substrate-binding lipoprotein-like protein [Paenibacillus larvae]	Y	PredHel=0	0	Y	CytoplasmicMembrane	Lipoprotein
1144	gi|568325887	29.82	7	2	2		29446	PTS IID component [Paenibacillus larvae]	Y	PredHel=5	5	0	CytoplasmicMembrane	Cytoplasmic
1144	gi|738761468	29.82	7	2	2		29412	PTS fructose transporter subunit IID [Paenibacillus larvae]	Y	PredHel=0	5	0	CytoplasmicMembrane	Cytoplasmic
1144	gi|750650043	29.82	7	2	2		29446	PTS fructose transporter subunit IID [Paenibacillus larvae]	Y	PredHel=0	0	0	CytoplasmicMembrane	Cytoplasmic
1165	gi|568326949	28.04	4	2	2		46862	oxygen sensor histidine kinase NreB [Paenibacillus larvae]	Y	PredHel=2	2	0	CytoplasmicMembrane	Membrane
1165	gi|918011903	28.04	4	2	2		46763	hypothetical protein [Paenibacillus larvae]	Y	PredHel=0	2	0	CytoplasmicMembrane	Membrane
1175	gi|558473091	41.32	12	3	3	Oxidation (M)	43666	permease-like protein [Paenibacillus larvae]	Y	PredHel=4	4	0	CytoplasmicMembrane	Membrane
1175	gi|568326938	41.32	12	3	3	Oxidation (M)	43652	ABC transporter permease YknZ [Paenibacillus larvae]	Y	PredHel=4	4	0	CytoplasmicMembrane	Membrane
1176	gi|916820823	41.68	7	5	2		79138	hypothetical protein [Paenibacillus larvae]	Y	PredHel=1	1	0	Unknown	Membrane
1176	gi|918011869	41.68	7	5	2		79078	hypothetical protein [Paenibacillus larvae]	Y	PredHel=0	1	0	Unknown	Membrane
1178	gi|558475116	28.55	8	2	2	Oxidation (M)	41201	sensor histidine kinase [Paenibacillus larvae]	Y	PredHel=2	2	0	CytoplasmicMembrane	Membrane
1181	gi|568325798	43.9	10	4	4	Oxidation (M)	76504	cadmium-transporting ATPase CadA [Paenibacillus larvae]	Y	PredHel=8	8	0	CytoplasmicMembrane	Cytoplasmic
1195	gi|558473753	27.74	6	2	2	Oxidation (M)	47446	hypothetical protein [Paenibacillus larvae]	Y	PredHel=1	1	0	Unknown	Cytoplasmic
1195	gi|568326215	27.74	6	2	2	Oxidation (M)	47445	hypothetical protein [Paenibacillus larvae]	Y	PredHel=1	1	0	Unknown	Cytoplasmic
1200	gi|568325733	35.13	3	2	2		57841	flagellar M-ring protein FliF [Paenibacillus larvae]	Y	PredHel=2	2	0	CytoplasmicMembrane	Membrane
1223	gi|568325719	35.67	10	2	2	Oxidation (M)	40990	flagellar biosynthesis protein FlhB [Paenibacillus larvae]	Y	PredHel=4	4	0	CytoplasmicMembrane	Membrane
1272	gi|738762795	34.44	8	3	3		29640	molybdate ABC transporter substrate-binding protein [Paenibacillus larvae]	Y	PredHel=0	0	Y	CytoplasmicMembrane	Lipoprotein
1272	gi|750650086	34.44	8	3	3		29612	molybdate ABC transporter substrate-binding protein [Paenibacillus larvae]	Y	PredHel=0	0	0	CytoplasmicMembrane	Lipoprotein
1272	gi|754755313	34.44	8	3	3		29608	molybdate ABC transporter substrate-binding protein [Paenibacillus larvae]	Y	PredHel=0	0	Y	CytoplasmicMembrane	Lipoprotein
1281	gi|568324328	41.92	17	4	4		26618	stage II sporulation protein Q [Paenibacillus larvae]	Y	PredHel=1	1	0	Cytoplasmic	Membrane
1281	gi|738762446	41.92	17	4	4		26646	membrane protein [Paenibacillus larvae]	Y	PredHel=0	1	0	Cytoplasmic	Membrane
1297	gi|558473986	42.29	7	4	4		83148	hypothetical protein [Paenibacillus larvae]	Y	PredHel=5	5	0	CytoplasmicMembrane	Membrane
1297	gi|568326427	42.29	7	4	4		83104	alpha/beta hydrolase [Paenibacillus larvae]	Y	PredHel=5	5	0	CytoplasmicMembrane	Membrane
1302	gi|558474559	47.79	12	5	5		73493	ferrous iron transporter B [Paenibacillus larvae]	Y	PredHel=9	11	0	CytoplasmicMembrane	Cytoplasmic
1317	gi|568326922	40.28	8	3	3		77709	multidrug resistance ABC transporter ATP-binding/permease YheH [Paenibacillus larvae]	Y	PredHel=5	4	Y	CytoplasmicMembrane	Membrane
1317	gi|817691414	40.28	8	3	3		77708	multidrug ABC transporter permease [Paenibacillus larvae]	Y	PredHel=4	4	Y	CytoplasmicMembrane	Membrane
1347	gi|558473009	59.96	3	2	2		60007	L-aspartate oxidase [Paenibacillus larvae]	Y	PredHel=1	0	0	Cytoplasmic	Membrane	Cytoplasmic
1348	gi|558476309	47	9	2	2		27992	stage III sporulation-like protein [Paenibacillus larvae]	Y	PredHel=2	2	0	Unknown	Cytoplasmic
1358	gi|568326675	37.09	4	3	3		42908	BMP family ABC transporter substrate-binding protein [Paenibacillus larvae]	Y	PredHel=0	1	0	Cytoplasmic	Lipoprotein
1362	gi|558473380	49.18	10	4	4		43572	D-alanyl-D-alanine carboxypeptidase [Paenibacillus larvae]	Y	PredHel=0	0	Y	CytoplasmicMembrane	Signal	GO:0016020 membrane
1366	gi|558474854	32.23	6	2	2		49592	hypothetical protein [Paenibacillus larvae]	Y	PredHel=9	9	0	CytoplasmicMembrane	Membrane
1366	gi|918159579	32.23	6	2	2		49620	hypothetical protein [Paenibacillus larvae]	Y	PredHel=0	9	0	CytoplasmicMembrane	Membrane
1373	gi|568325625	34.13	12	3	3		48209	sodium-dependent transporter [Paenibacillus larvae]	Y	PredHel=11	11	0	CytoplasmicMembrane	Membrane
1404	gi|558474353	25.46	4	2	2		47047	sodium exporter-like protein [Paenibacillus larvae]	Y	PredHel=7	7	0	CytoplasmicMembrane	Membrane
1409	gi|738762283	27.06	8	2	2	Oxidation (M)	41921	hypothetical protein [Paenibacillus larvae]	Y	PredHel=0	1	0	Unknown	Membrane
1409	gi|754754833	27.06	8	2	2	Oxidation (M)	41951	hypothetical protein [Paenibacillus larvae]	Y	PredHel=0	1	0	Unknown	Membrane
1415	gi|558473217	37.43	4	2	2		57414	hypothetical protein [Paenibacillus larvae]	Y	PredHel=3	3	0	CytoplasmicMembrane	Cytoplasmic
1449	gi|754755019	32.39	5	3	3		72171	hypothetical protein [Paenibacillus larvae]	Y	PredHel=0	0	0	CytoplasmicMembrane	Membrane
1449	gi|817691440	32.39	5	3	3		72201	hypothetical protein [Paenibacillus larvae]	Y	PredHel=0	1	0	CytoplasmicMembrane	Membrane
1458	gi|568325131	38.2	10	3	3		35566	manganese-binding lipoprotein MntA [Paenibacillus larvae]	Y	PredHel=1	0	Y	CytoplasmicMembrane	Lipoprotein
1458	gi|738764807	38.2	10	3	3		35552	manganese transporter [Paenibacillus larvae]	Y	PredHel=0	0	Y	CytoplasmicMembrane	Lipoprotein
1469	gi|558473624	37.63	5	3	3		89903	penicillin-binding-like protein 2C [Paenibacillus larvae]	Y	PredHel=1	1	0	CytoplasmicMembrane	Membrane
1469	gi|568326045	37.63	5	3	3		89794	penicillin-binding protein 1F [Paenibacillus larvae]	Y	PredHel=1	1	0	CytoplasmicMembrane	Membrane
1469	gi|916820849	37.63	5	3	3		89889	hypothetical protein [Paenibacillus larvae]	Y	PredHel=1	1	0	CytoplasmicMembrane	Membrane
1469	gi|918011906	37.63	5	3	3		89961	hypothetical protein [Paenibacillus larvae]	Y	PredHel=2	1	0	CytoplasmicMembrane	Membrane
1481	gi|738765009	30.84	4	2	2		74871	hypothetical protein [Paenibacillus larvae]	Y	PredHel=0	10	0	CytoplasmicMembrane	Membrane
1481	gi|754754661	30.84	4	2	2		74871	hypothetical protein [Paenibacillus larvae]	Y	PredHel=0	10	0	CytoplasmicMembrane	Membrane
1492	gi|738760999	46.93	2	2	2		116306	hypothetical protein [Paenibacillus larvae]	Y	PredHel=0	9	Y	CytoplasmicMembrane	Signal
1492	gi|754754408	46.93	2	2	2		116244	hypothetical protein [Paenibacillus larvae]	Y	PredHel=0	9	Y	CytoplasmicMembrane	Signal
1508	gi|754753736	42.18	6	4	4		77107	membrane protein [Paenibacillus larvae]	Y	PredHel=0	9	0	CytoplasmicMembrane	Cytoplasmic
1508	gi|817691522	42.18	6	4	4		77106	membrane protein [Paenibacillus larvae]	Y	PredHel=0	9	0	CytoplasmicMembrane	Cytoplasmic
1520	gi|738762093	31.22	14	3	3		37643	cytochrome b [Paenibacillus larvae]	Y	PredHel=0	2	Y	CytoplasmicMembrane	Membrane
1520	gi|750649675	31.22	15	3	3		35179	cytochrome b partial [Paenibacillus larvae]	Y	PredHel=0	2	0	CytoplasmicMembrane	Membrane
1541	gi|568326558	34.82	11	3	3	Oxidation (M)	47802	ABC transporter substrate-binding protein [Paenibacillus larvae]	Y	PredHel=1	0	Y	Unknown	Lipoprotein
1542	gi|558473025	32.82	9	3	3		39821	molecular chaperone lipoprotein-like protein [Paenibacillus larvae]	Y	PredHel=1	0	Y	CytoplasmicMembrane	Lipoprotein
1542	gi|754754830	32.82	9	3	3		39806	hypothetical protein [Paenibacillus larvae]	Y	PredHel=0	0	Y	CytoplasmicMembrane	Lipoprotein
1544	gi|738760866	32.17	2	2	2		66295	multidrug ABC transporter ATP-binding protein [Paenibacillus larvae]	Y	PredHel=0	6	0	CytoplasmicMembrane	Membrane
1553	gi|985760820	37.35	6	3	2		75768	tail length tape measure protein [Brevibacillus phage Jimmer1]	Y	PredHel=2	5	0	CytoplasmicMembrane	Cytoplasmic
1585	gi|750649792	33.42	5	3	2		72440	hypothetical protein [Paenibacillus larvae]	Y	PredHel=0	0	0	CytoplasmicMembrane	Membrane
1585	gi|918159596	33.42	6	3	2		69679	hypothetical protein [Paenibacillus larvae]	Y	PredHel=1	9	0	CytoplasmicMembrane	Membrane
1591	gi|568326599	41.46	14	4	4	Oxidation (M)	44053	hypothetical protein [Paenibacillus larvae]	Y	PredHel=2	2	0	CytoplasmicMembrane	Cytoplasmic
1639	gi|568324382	45.19	8	2	2		28267	motility protein A [Paenibacillus larvae]	Y	PredHel=4	3	Y	CytoplasmicMembrane	Membrane
1679	gi|738762569	32.49	7	3	3		55167	cardiolipin synthase [Paenibacillus larvae]	Y	PredHel=0	1	Y	CytoplasmicMembrane	Membrane
1684	gi|738763343	32.28	5	2	2		55176	two-component sensor histidine kinase [Paenibacillus larvae]	Y	PredHel=0	2	0	CytoplasmicMembrane	Membrane
1717	gi|738765500	33.14	3	2	2	Oxidation (M)	101745	ATPase [Paenibacillus larvae]	Y	PredHel=0	10	0	CytoplasmicMembrane	Cytoplasmic
1717	gi|750648721	33.14	3	2	2	Oxidation (M)	98677	ATPase partial [Paenibacillus larvae]	Y	PredHel=1	10	0	CytoplasmicMembrane	Cytoplasmic
1735	gi|558474561	26.84	3	2	2		77194	transpeptidase-like protein [Paenibacillus larvae]	Y	PredHel=1	1	0	CytoplasmicMembrane	Membrane
1735	gi|568326649	26.84	3	2	2		78858	hypothetical protein [Paenibacillus larvae]	Y	PredHel=1	1	0	CytoplasmicMembrane	Membrane
1763	gi|738764077	43.53	6	3	3	Oxidation (M)	57283	MFS transporter [Paenibacillus larvae]	Y	PredHel=2	13	0	CytoplasmicMembrane	Signal
1763	gi|754755376	43.53	6	3	3	Oxidation (M)	57260	MFS transporter [Paenibacillus larvae]	Y	PredHel=0	13	0	CytoplasmicMembrane	Signal
1766	gi|817691540	25.54	7	2	2		53694	hypothetical protein [Paenibacillus larvae]	Y	PredHel=0	1	0	Unknown	Membrane
1777	gi|916820983	26.19	1	2	2		168385	type I polyketide synthase [Paenibacillus larvae]	Y	PredHel=0	2	0	CytoplasmicMembrane	Cytoplasmic
1777	gi|918159703	26.19	1	2	2		168460	type I polyketide synthase [Paenibacillus larvae]	Y	PredHel=0	2	0	CytoplasmicMembrane	Cytoplasmic
1789	gi|916820848	36.74	6	2	2		40872	hypothetical protein [Paenibacillus larvae]	Y	PredHel=0	1	0	CytoplasmicMembrane	Membrane
1789	gi|918159662	36.74	6	2	2		40840	hypothetical protein [Paenibacillus larvae]	Y	PredHel=0	1	0	CytoplasmicMembrane	Membrane
1794	gi|558475483	29.79	8	3	3		46237	RIP metalloprotease RseP [Paenibacillus larvae]	Y	PredHel=4	0	0	CytoplasmicMembrane	Cytoplasmic
1797	gi|558475228	32.59	7	2	2		51130	methyl-accepting-like protein [Paenibacillus larvae]	Y	PredHel=5	6	0	CytoplasmicMembrane	Cytoplasmic
1836	gi|558476343	38.81	14	3	3		35499	iron hydroxamate-binding lipoprotein-like protein [Paenibacillus larvae]	Y	PredHel=0	0	Y	CytoplasmicMembrane	Lipoprotein
1836	gi|568325292	38.81	14	3	3		35585	iron-uptake system-binding protein FeuA [Paenibacillus larvae]	Y	PredHel=0	0	Y	CytoplasmicMembrane	Lipoprotein
1866	gi|558474149	34.5	11	2	2		30679	glutamine ABC transporter-like protein [Paenibacillus larvae]	Y	PredHel=0	0	Y	CytoplasmicMembrane	Lipoprotein
1873	gi|558475607	31.78	13	3	3		24866	hypothetical protein [Paenibacillus larvae]	Y	PredHel=1	1	0	Cytoplasmic	Cytoplasmic
1888	gi|754754067	25.65	3	2	2		38154	conjugal transfer protein [Paenibacillus larvae]	Y	PredHel=0	1	0	CytoplasmicMembrane	Membrane 38-56
1905	gi|568325983	25.12	6	2	2		51549	lipoprotein [Paenibacillus larvae]	Y	PredHel=1	0	Y	CytoplasmicMembrane	Signal
1905	gi|738761539	25.12	6	2	2		51579	hypothetical protein [Paenibacillus larvae]	Y	PredHel=2	0	Y	CytoplasmicMembrane	Signal
1920	gi|916820906	27.96	7	2	2		36273	HAMP domain-containing protein [Paenibacillus larvae]	Y	PredHel=1	1	0	CytoplasmicMembrane	Cytoplasmic
1920	gi|919197458	27.96	5	2	2		48677	HAMP domain-containing protein [Paenibacillus larvae]	Y	PredHel=0	2	0	CytoplasmicMembrane	Cytoplasmic
1923	gi|558476022	28.6	3	2	2		75221	hypothetical protein [Paenibacillus larvae]	Y	PredHel=1	1	0	Unknown	Membrane
1930	gi|568325441	24.53	7	2	2		15847	hypothetical protein [Paenibacillus larvae]	Y	PredHel=2	3	Y	CytoplasmicMembrane	Cytoplasmic
1930	gi|738761044	24.53	7	2	2		15960	hypothetical protein [Paenibacillus larvae]	Y	PredHel=0	3	Y	CytoplasmicMembrane	Cytoplasmic
1936	gi|568326221	40.71	7	3	3		39514	exopolysaccharide biosynthesis protein [Paenibacillus larvae]	Y	PredHel=1	1	0	Unknown	Membrane
1936	gi|738763090	40.71	7	3	3		40082	hypothetical protein [Paenibacillus larvae]	Y	PredHel=0	1	0	Unknown	Membrane
1937	gi|568324287	27.74	9	2	2		47429	D-alanyl-D-alanine carboxypeptidase [Paenibacillus larvae]	Y	PredHel=1	0	Y	CytoplasmicMembrane	Signal
1940	gi|568325725	29.94	20	3	3		16486	flagellar basal body-associated protein FliL [Paenibacillus larvae]	Y	PredHel=1	0	Y	Unknown	Membrane
1945	gi|558474135	27.71	6	2	2		39361	ABC transporter-like protein for spermidine/putrescine [Paenibacillus larvae]	Y	PredHel=0	0	0	CytoplasmicMembrane	Cytoplasmic	GO:0016020 membrane
1992	gi|568325537	31.07	5	2	2		38658	hypothetical protein [Paenibacillus larvae]	Y	PredHel=1	1	0	Unknown	Membrane
2005	gi|558473244	34.68	4	2	2		60225	potassium-transporting ATPase subunit KdpA [Paenibacillus larvae]	Y	PredHel=10	10	0	CytoplasmicMembrane	Cytoplasmic
2005	gi|568324481	34.68	4	2	2		60279	potassium-transporting ATPase subunit KdpA [Paenibacillus larvae]	Y	PredHel=10	10	0	CytoplasmicMembrane	Cytoplasmic
2016	gi|754754244	41.99	5	2	2	Oxidation (M)	65711	spore germination protein [Paenibacillus larvae]	Y	PredHel=0	6	0	CytoplasmicMembrane	Cytoplasmic
2016	gi|817691410	41.99	5	2	2	Oxidation (M)	65671	spore germination protein [Paenibacillus larvae]	Y	PredHel=0	6	0	CytoplasmicMembrane	Cytoplasmic
2027	gi|568325951	27.59	10	2	2	Oxidation (M)	34657	peptide ABC transporter permease [Paenibacillus larvae]	Y	PredHel=6	6	0	CytoplasmicMembrane	Membrane
2064	gi|558475151	35.37	21	3	3		22574	signal peptidase I [Paenibacillus larvae]	Y	PredHel=1	1	0	CytoplasmicMembrane	Membrane
2064	gi|738765416	35.37	21	3	3		22588	signal peptidase I [Paenibacillus larvae]	Y	PredHel=0	1	0	CytoplasmicMembrane	Membrane
2119	gi|558473565	38	8	2	2		36358	preprotein translocase subunit SecF-like protein [Paenibacillus larvae]	Y	PredHel=5	6	0	CytoplasmicMembrane	Membrane
2144	gi|918159610	31.5	7	2	2		28439	hypothetical protein [Paenibacillus larvae]	Y	PredHel=0	4	0	CytoplasmicMembrane	Membrane
2198	gi|738762799	26.5	3	2	2		96757	lysylcardiolipin synthase / lysyltransferase [Paenibacillus larvae]	Y	PredHel=1	13	Y	CytoplasmicMembrane	Membrane
2259	gi|558473248	23.22	3	2	2	Oxidation (M)	87044	hypothetical protein [Paenibacillus larvae]	Y	PredHel=0	0	0	CytoplasmicMembrane	Cytoplasmic	GO:0016020 membrane
2299	gi|738762331	31.24	6	2	2		44704	RND transporter MFP subunit [Paenibacillus larvae]	Y	PredHel=6	1	0	Unknown	Membrane
2300	gi|738762677	28.56	6	2	2		68994	two-component sensor histidine kinase [Paenibacillus larvae]	Y	PredHel=0	1	Y	CytoplasmicMembrane	Membrane
2300	gi|817691473	28.56	6	2	2		69008	two-component sensor histidine kinase [Paenibacillus larvae]	Y	PredHel=10	1	Y	CytoplasmicMembrane	Membrane
2316	gi|750649120	27.91	4	2	2		77196	stage II sporulation protein E partial [Paenibacillus larvae]	Y	PredHel=0	6	0	CytoplasmicMembrane	Cytoplasmic
2316	gi|754755384	27.91	3	2	2		92609	stage II sporulation protein E [Paenibacillus larvae]	Y	PredHel=0	9	0	CytoplasmicMembrane	Membrane
2323	gi|558473239	28.98	3	2	2		72459	two-component sensor histidine kinase-like protein [Paenibacillus larvae]	Y	PredHel=8	7	Y	CytoplasmicMembrane	Signal
2323	gi|918011880	28.98	4	2	2		52331	hypothetical protein partial [Paenibacillus larvae]	Y	PredHel=0	7	0	CytoplasmicMembrane	Membrane
2342	gi|754753902	30.04	4	2	2		73826	chemotaxis protein [Paenibacillus larvae]	Y	PredHel=5	2	0	CytoplasmicMembrane	Membrane
2342	gi|817691481	30.04	4	2	2		73899	chemotaxis protein [Paenibacillus larvae]	Y	PredHel=14	2	0	CytoplasmicMembrane	Membrane
2342	gi|918011792	30.04	4	2	2		73913	chemotaxis protein [Paenibacillus larvae]	Y	PredHel=0	2	0	CytoplasmicMembrane	Membrane
2382	gi|568324311	23.71	18	2	2		18866	ATP synthase F0 subunit B [Paenibacillus larvae]	Y	PredHel=1	1	0	CytoplasmicMembrane	Membrane
2550	gi|916820973	29.44	4	2	2		71002	DNA internalization-related competence protein ComEC/Rec2 [Paenibacillus larvae]	Y	PredHel=0	9	0	CytoplasmicMembrane	Cytoplasmic
2550	gi|918159621	29.44	4	2	2		70232	DNA internalization-related competence protein ComEC/Rec2 [Paenibacillus larvae]	Y	PredHel=0	0	0	CytoplasmicMembrane	Cytoplasmic
2558	gi|738762141	25.32	9	2	2	Oxidation (M)	48795	hypothetical protein [Paenibacillus larvae]	Y	PredHel=0	2	0	CytoplasmicMembrane	Cytoplasmic
2564	gi|558474200	29.8	4	2	2		28493	phosphate ABC transporter ATP-binding protein [Paenibacillus larvae]	Y	PredHel=0	0	0	CytoplasmicMembrane	Cytoplasmic	GO:0016020 membrane
2646	gi|568324701	35.56	6	2	2		52277	two-component sensor histidine kinase [Paenibacillus larvae]	Y	PredHel=2	2	0	CytoplasmicMembrane	Membrane
2646	gi|738762066	35.56	6	2	2		52307	two-component sensor histidine kinase [Paenibacillus larvae]	Y	PredHel=0	2	0	CytoplasmicMembrane	Membrane
2710	gi|558475910	28.06	6	2	2		65332	hypothetical protein [Paenibacillus larvae]	Y	PredHel=12	13	0	CytoplasmicMembrane	Membrane
2752	gi|558474570	27.3	13	2	2		24926	hypothetical protein [Paenibacillus larvae]	Y	PredHel=0	0	Y	Unknown	Signal	GO:0019867 outer membrane
2783	gi|738761616	30.79	5	2	2		37582	hydrolase [Paenibacillus larvae]	Y	PredHel=0	4	0	CytoplasmicMembrane	Cytoplasmic
2803	gi|754753899	24.79	6	2	2		40573	hypothetical protein [Paenibacillus larvae]	Y	PredHel=0	5	0	CytoplasmicMembrane	Cytoplasmic
2803	gi|916820894	24.79	4	2	2		56385	hypothetical protein [Paenibacillus larvae]	Y	PredHel=0	7	0	CytoplasmicMembrane	Cytoplasmic
2811	gi|568325899	27.21	4	2	2	Oxidation (M)	61809	sporulation kinase C [Paenibacillus larvae]	Y	PredHel=3	4	0	CytoplasmicMembrane	Cytoplasmic
2892	gi|738762782	34.04	5	2	2	Carbamidomethylation	54432	hypothetical protein [Paenibacillus larvae]	Y	PredHel=0	1	0	CytoplasmicMembrane	Cytoplasmic
NOTE: "Protein group" refers to the proteins identified by a common set of peptides; "Accession number" is the unique number given to mark the entry of a protein in the database of NCBInr; " -10lgP" is a conversion of P-value, by which a more significant match will have a higher -10lgP value; "Coverage" is the ratio of the number of amino acids in peptides that yield by experimental mass spectra …

## Sheet: Table S1-2
Table S1-2. Membrane protein identification of Paenibacillus larvae treated with N-glycosylated major royal jelly protein 2.
Protein Group	Accession	-10lgP	Coverage (%)	#Peptides	#Unique	PTM	Avg. Mass	Description	Predicted as membrane protein?	TMHMM	PHOBIUS		PSORTB	PRED-LIPO	InterProscan
											TM	SP
9	gi|738762297	221.41	42	18	18	Carbamidomethylation; Oxidation (M)	36625	BMP family ABC transporter substrate-binding protein [Paenibacillus larvae]	Y	PredHel=0	0	Y	Unknown	Lipoprotein	GO:0005886 plasma membrane
55	gi|558476232	160.17	36	20	20	Oxidation (M)	62381	methyl-accepting chemotaxis-like protein [Paenibacillus larvae]	Y	PredHel=1	1	Y	Cytoplasmic Membrane	Membrane
65	gi|558475899	151.93	44	19	19	Carbamidomethylation; Oxidation (M)	59045	formyl-tetrahydrofolate synthetase-like protein [Paenibacillus larvae]	Y	PredHel=0	1	0	Cytoplasmic	Membrane
77	gi|738760790	170.13	32	20	19	Oxidation (M)	57823	ribonuclease Y [Paenibacillus larvae]	Y	PredHel=1	1	0	Cytoplasmic	Membrane
117	gi|558473011	135.52	29	18	18	Oxidation (M)	75753	hypothetical protein [Paenibacillus larvae]	Y	PredHel=2	2	0	CytoplasmicMembrane	Membrane
169	gi|558474182	50.57	5	2	2		52191	protein associated with the phosphotransferase system [Paenibacillus larvae]	Y	PredHel=10	10	0	CytoplasmicMembrane	Cytoplasmic
169	gi|568326553	50.57	5	2	2		52210	PTS N-acetylglucosamine IIBC component [Paenibacillus larvae]	Y	PredHel=10	10	0	CytoplasmicMembrane	Cytoplasmic
210	gi|568325120	58.86	7	7	7	Oxidation (M)	124421	hypothetical protein [Paenibacillus larvae]	Y	PredHel=1	3	0	CytoplasmicMembrane	Cytoplasmic
221	gi|558473530	74.01	6	14	14	Carbamidomethylation; Oxidation (M)	319464	hypothetical protein [Paenibacillus larvae]	Y	PredHel=6	7	0	CytoplasmicMembrane	Cytoplasmic
221	gi|568325266	74.01	6	14	14	Carbamidomethylation; Oxidation (M)	319480	glycosyltransferase family 36 protein [Paenibacillus larvae]	Y	PredHel=6	7	0	CytoplasmicMembrane	Cytoplasmic
256	gi|558474009	50.22	17	4	4		30052	L-serine dehydratase iron-sulfur-dependent subunit alpha [Paenibacillus larvae]	Y	PredHel=0	1	0	CytoplasmicMembrane	Cytoplasmic
261	gi|738762252	104.4	5	3	3		39080	PIN/TRAM domain-containing protein [Paenibacillus larvae]	Y	PredHel=4	3	Y	CytoplasmicMembrane	Signal
277	gi|568324813	41.44	4	3	3		69250	ABC transporter ATP-binding protein [Paenibacillus larvae]	Y	PredHel=5	5	0	CytoplasmicMembrane	Membrane
277	gi|738762034	41.44	4	3	3		69229	ABC transporter [Paenibacillus larvae]	Y	PredHel=5	5	0	CytoplasmicMembrane	Membrane
317	gi|738761914	52.34	9	4	4	Oxidation (M)	73643	hypothetical protein [Paenibacillus larvae]	Y	PredHel=6	6	0	CytoplasmicMembrane	Cytoplasmic
325	gi|558473173	73.89	13	6	6	Oxidation (M)	43412	membrane serine protease-like protein Do [Paenibacillus larvae]	Y	PredHel=1	1	0	Cytoplasmic	Membrane
325	gi|568324397	73.89	13	6	6	Oxidation (M)	43378	serine protease [Paenibacillus larvae]	Y	PredHel=1	1	0	Cytoplasmic	Membrane
360	gi|558474891	88.26	9	8	8		115661	phage tail tape measure protein [Paenibacillus larvae]	Y	PredHel=0	3	0	Unknown	Cytoplasmic
370	gi|558473348	55.35	16	3	3		30081	methionine ABC transporter substrate-binding lipoprotein-like protein [Paenibacillus larvae]	Y	PredHel=0	0	Y	CytoplasmicMembrane	Lipoprotein
375	gi|558475511	55.79	9	4	4		45033	flagellar motor switch phosphatase FliY [Paenibacillus larvae]	Y	PredHel=0	0	0	CytoplasmicMembrane	Cytoplasmic	GO:0009288 bacterial-type flagellum GO:0009425 bacterial-type flagellum basal body GO:0016020 membrane
375	gi|754754472	55.79	9	4	4		44996	flagellar motor switch phosphatase FliY [Paenibacillus larvae]	Y	PredHel=0	0	0	CytoplasmicMembrane	Cytoplasmic	GO:0016020 membrane
398	gi|558473009	69.14	8	4	4		60007	L-aspartate oxidase [Paenibacillus larvae]	Y	PredHel=1	0	0	Cytoplasmic	Membrane
413	gi|568324482	56.69	13	7	7		72268	potassium-transporting ATPase B chain KdpB [Paenibacillus larvae]	Y	PredHel=7	7	0	CytoplasmicMembrane	Membrane
456	gi|568324390	86.93	10	6	6	Oxidation (M)	73315	hypothetical protein [Paenibacillus larvae]	Y	PredHel=1	1	0	CytoplasmicMembrane	Membrane
485	gi|558473117	39.32	6	3	3		79128	methyl-accepting-like protein [Paenibacillus larvae]	Y	PredHel=6	6	0	CytoplasmicMembrane	Membrane
488	gi|558475606	54.85	4	2	2	Oxidation (M)	63138	glycine/betaine ABC transporter permease [Paenibacillus larvae]	Y	PredHel=7	6	0	CytoplasmicMembrane	Membrane
496	gi|918159610	37.39	10	3	3		28439	hypothetical protein [Paenibacillus larvae]	Y	PredHel=4	4	0	CytoplasmicMembrane	Membrane
509	gi|609217216	61.48	18	10	6		75203	tail length tape measure protein [Brevibacillus phage Davies]	Y	PredHel=4	5	0	CytoplasmicMembrane	Cytoplasmic
509	gi|971767187	61.48	18	10	6		75203	tail length tape measure protein [Brevibacillus phage Abouo]	Y	PredHel=4	5	0	CytoplasmicMembrane	Cytoplasmic
518	gi|558473790	100.19	9	6	6	Oxidation (M)	76579	protein kinase-like protein [Paenibacillus larvae]	Y	PredHel=1	1	0	CytoplasmicMembrane	Cytoplasmic
518	gi|568325808	100.19	9	6	6	Oxidation (M)	76611	serine/threonine-protein kinase PrkC [Paenibacillus larvae]	Y	PredHel=1	1	0	CytoplasmicMembrane	Cytoplasmic
562	gi|558474187	56.11	17	6	6	Oxidation (M)	47815	ABC transporter substrate-binding protein [Paenibacillus larvae]	Y	PredHel=1	0	Y	Unknown	Lipoprotein
562	gi|568326558	56.11	17	6	6	Oxidation (M)	47802	ABC transporter substrate-binding protein [Paenibacillus larvae]	Y	PredHel=1	0	Y	Unknown	Lipoprotein
564	gi|558475687	53.57	10	7	7	Oxidation (M)	86628	copper transporter ATPase-like protein [Paenibacillus larvae]	Y	PredHel=5	8	0	CytoplasmicMembrane	Cytoplasmic
564	gi|568326709	53.57	10	7	7	Oxidation (M)	86176	copper-exporting P-type ATPase A [Paenibacillus larvae]	Y	PredHel=5	8	0	CytoplasmicMembrane	Cytoplasmic
568	gi|738760999	78.46	4	5	5		116306	hypothetical protein [Paenibacillus larvae]	Y	PredHel=10	9	Y	CytoplasmicMembrane	Signal
568	gi|754754408	78.46	4	5	5		116244	hypothetical protein [Paenibacillus larvae]	Y	PredHel=10	9	Y	CytoplasmicMembrane	Signal
572	gi|558474247	37.77	3	2	2		83707	cation-transporting P-type ATPase PacL-like protein [Paenibacillus larvae]	Y	PredHel=10	10	0	CytoplasmicMembrane	Membrane
589	gi|558474263	78.9	4	3	3	Oxidation (M)	73131	cytochrome ubiquinol oxidase subunit I [Paenibacillus larvae]	Y	PredHel=14	15	0	CytoplasmicMembrane	Membrane
591	gi|558475630	43.44	19	2	2	Oxidation (M)	21174	hypothetical protein [Paenibacillus larvae]	Y	PredHel=1	0	Y	Unknown	Lipoprotein
611	gi|568324701	37.17	9	3	3		52277	two-component sensor histidine kinase [Paenibacillus larvae]	Y	PredHel=2	2	0	CytoplasmicMembrane	Membrane
611	gi|738762066	37.17	9	3	3		52307	two-component sensor histidine kinase [Paenibacillus larvae]	Y	PredHel=2	2	0	CytoplasmicMembrane	Membrane
631	gi|916820903	52.8	20	3	3		24416	hypothetical protein [Paenibacillus larvae]	Y	PredHel=1	1	0	CytoplasmicMembrane	Membrane
655	gi|558473817	46.8	6	2	2		42836	cell division protein FtsW [Paenibacillus larvae]	Y	PredHel=10	9	Y	CytoplasmicMembrane	Signal
665	gi|558474561	51.23	9	4	4	Oxidation (M)	77194	transpeptidase-like protein [Paenibacillus larvae]	Y	PredHel=1	1	0	CytoplasmicMembrane	Membrane
665	gi|568326649	51.23	9	4	4	Oxidation (M)	78858	hypothetical protein [Paenibacillus larvae]	Y	PredHel=1	1	0	CytoplasmicMembrane	Membrane
678	gi|558473624	45.63	6	5	5		89903	penicillin-binding-like protein 2C [Paenibacillus larvae]	Y	PredHel=1	1	0	CytoplasmicMembrane	Membrane
678	gi|568326045	45.63	6	5	5		89794	penicillin-binding protein 1F [Paenibacillus larvae]	Y	PredHel=1	1	0	CytoplasmicMembrane	Membrane
678	gi|916820849	45.63	6	5	5		89889	hypothetical protein [Paenibacillus larvae]	Y	PredHel=1	1	0	CytoplasmicMembrane	Membrane
682	gi|738763138	54.62	13	6	6	Oxidation (M)	67073	hypothetical protein [Paenibacillus larvae]	Y	PredHel=1	0	Y	CytoplasmicMembrane	Membrane
682	gi|750648575	54.62	13	6	6	Oxidation (M)	67057	hypothetical protein [Paenibacillus larvae]	Y	PredHel=1	0	Y	CytoplasmicMembrane	Membrane
682	gi|754754599	54.62	13	6	6	Oxidation (M)	67013	hypothetical protein [Paenibacillus larvae]	Y	PredHel=1	0	Y	CytoplasmicMembrane	Membrane
687	gi|558473239	36.32	3	2	2		72459	two-component sensor histidine kinase-like protein [Paenibacillus larvae]	Y	PredHel=8	7	Y	CytoplasmicMembrane	Signal
687	gi|918011880	36.32	3	2	2		52331	hypothetical protein partial [Paenibacillus larvae]	Y	PredHel=7	7	0	CytoplasmicMembrane	Membrane
746	gi|754755183	53.08	12	4	4	Carbamidomethylation; Oxidation (M)	69428	hypothetical protein [Paenibacillus larvae]	Y	PredHel=1	0	Y	Unknown	Membrane
756	gi|568326592	36.78	4	2	2	Carbamidomethylation; Oxidation (M)	89463	histidine kinase [Paenibacillus larvae]	Y	PredHel=11	10	0	CytoplasmicMembrane	Membrane
756	gi|738761974	36.78	4	2	2	Carbamidomethylation; Oxidation (M)	89454	hypothetical protein [Paenibacillus larvae]	Y	PredHel=11	10	0	CytoplasmicMembrane	Membrane
765	gi|568324328	56.53	24	5	5	Oxidation (M)	26618	stage II sporulation protein Q [Paenibacillus larvae]	Y	PredHel=1	1	0	Cytoplasmic	Membrane
765	gi|738762446	56.53	24	5	5	Oxidation (M)	26646	membrane protein [Paenibacillus larvae]	Y	PredHel=1	1	0	Cytoplasmic	Membrane
769	gi|558475203	50.18	5	4	3		93405	phage tail tape measure protein [Paenibacillus larvae]	Y	PredHel=2	2	0	CytoplasmicMembrane	Cytoplasmic
769	gi|558475567	50.18	5	4	3		93331	phage tail tape measure protein [Paenibacillus larvae]	Y	PredHel=2	2	0	CytoplasmicMembrane	Cytoplasmic
769	gi|971740662	50.18	5	4	3		93388	membrane protein P6 [Paenibacillus phage HB10c2]	Y	PredHel=2	2	0	CytoplasmicMembrane	Cytoplasmic
769	gi|971743553	50.18	5	4	3		93405	tail tape measure [Bacteriophage Diva]	Y	PredHel=2	2	0	CytoplasmicMembrane	Cytoplasmic
769	gi|971748160	50.18	5	4	3		93404	tail tape-measure protein [Paenibacillus phage Xenia]	Y	PredHel=2	2	0	CytoplasmicMembrane	Cytoplasmic
769	gi|971749415	50.18	5	4	3		93405	tail tape-measure protein [Paenibacillus phage Fern]	Y	PredHel=2	2	0	CytoplasmicMembrane	Cytoplasmic
769	gi|971749688	50.18	5	4	3		93405	tail tape measure [Bacteriophage Sitara]	Y	PredHel=2	2	0	CytoplasmicMembrane	Cytoplasmic
769	gi|985759346	50.18	5	4	3		93405	tail tape measure [Bacteriophage Rani]	Y	PredHel=2	2	0	CytoplasmicMembrane	Cytoplasmic
788	gi|558473196	33.89	7	2	2	Carbamidomethylation	32858	small-conductance mechanosensitive channel-like protein [Paenibacillus larvae]	Y	PredHel=3	3	0	CytoplasmicMembrane	Membrane
806	gi|754755019	34.68	5	2	2		72171	hypothetical protein [Paenibacillus larvae]	Y	PredHel=1	1	0	CytoplasmicMembrane	Membrane
806	gi|817691440	34.68	5	2	2		72201	hypothetical protein [Paenibacillus larvae]	Y	PredHel=1	1	0	CytoplasmicMembrane	Membrane
839	gi|558474877	41.08	8	4	4		54979	flotillin [Paenibacillus larvae]	Y	PredHel=1	1	0	CytoplasmicMembrane	Membrane
840	gi|916820983	36.54	1	2	2		168385	type I polyketide synthase [Paenibacillus larvae]	Y	PredHel=0	2	0	CytoplasmicMembrane	Cytoplasmic
840	gi|918159703	36.54	1	2	2		168460	type I polyketide synthase [Paenibacillus larvae]	Y	PredHel=0	2	0	CytoplasmicMembrane	Cytoplasmic
853	gi|738762093	35.91	11	3	3		37643	cytochrome b [Paenibacillus larvae]	Y	PredHel=3	2	Y	CytoplasmicMembrane	Membrane
853	gi|750649675	35.91	12	3	3		35179	cytochrome b partial [Paenibacillus larvae]	Y	PredHel=2	2	0	CytoplasmicMembrane	Membrane
857	gi|918011817	47.63	23	7	7		36411	hypothetical protein [Paenibacillus larvae]	Y	PredHel=1	0	Y	Cytoplasmic	Signal
860	gi|568325853	43.92	15	2	2		21014	hypothetical protein [Paenibacillus larvae]	Y	PredHel=1	1	0	Cytoplasmic	Membrane
862	gi|738760866	63.62	5	4	4		66295	multidrug ABC transporter ATP-binding protein [Paenibacillus larvae]	Y	PredHel=5	6	0	CytoplasmicMembrane	Membrane
863	gi|738764063	55.08	15	6	6		51839	ABC transporter [Paenibacillus larvae]	Y	PredHel=2	1	Y	Unknown	Membrane
863	gi|754755405	55.08	15	6	6		51851	ABC transporter [Paenibacillus larvae]	Y	PredHel=2	1	Y	Unknown	Membrane
870	gi|568324888	29.82	14	2	2		20658	hypothetical protein [Paenibacillus larvae]	Y	PredHel=1	0	Y	Cytoplasmic	Membrane
872	gi|558475504	36.74	5	3	3		74207	flagellar biosynthesis protein FlhA [Paenibacillus larvae]	Y	PredHel=7	7	0	CytoplasmicMembrane	Membrane
884	gi|738762537	34.56	4	2	2		63081	hypothetical protein [Paenibacillus larvae]	Y	PredHel=12	13	0	CytoplasmicMembrane	Membrane
892	gi|558474109	35.49	3	2	2	Oxidation (M)	66541	PAS domain-containing sensor histidine kinase [Paenibacillus larvae]	Y	PredHel=2	2	0	CytoplasmicMembrane	Membrane
902	gi|738763037	40.76	4	5	5		131257	phage tail tape measure protein [Paenibacillus larvae]	Y	PredHel=10	8	0	CytoplasmicMembrane	Cytoplasmic
902	gi|971482324	40.76	4	5	5		131287	tail tape-measure protein [Paenibacillus phage Harrison]	Y	PredHel=10	8	0	CytoplasmicMembrane	Cytoplasmic
902	gi|971741592	40.76	4	5	5		131287	tail tape-measure protein [Paenibacillus phage Vegas]	Y	PredHel=10	8	0	CytoplasmicMembrane	Cytoplasmic
910	gi|558476220	46.41	4	3	3		115468	hypothetical protein [Paenibacillus larvae]	Y	PredHel=12	12	0	CytoplasmicMembrane	Membrane
910	gi|568324596	46.41	4	3	3		115359	hypothetical protein [Paenibacillus larvae]	Y	PredHel=12	12	0	CytoplasmicMembrane	Membrane
925	gi|738761361	45.28	9	6	6		84797	phage tail tape measure protein [Paenibacillus larvae]	Y	PredHel=2	2	0	Unknown	Cytoplasmic
925	gi|918011942	45.28	9	6	6		87081	phage tail tape measure protein partial [Paenibacillus larvae]	Y	PredHel=2	2	0	Unknown	Cytoplasmic
930	gi|568325730	41.67	16	4	4		33429	protein kinase PKN/PRK1 effector flagellar motor switch protein FliG-like protein [Paenibacillus larvae]	Y	PredHel=1	1	0	Unknown	Membrane
933	gi|558473753	53.73	14	5	5	Oxidation (M)	47446	hypothetical protein [Paenibacillus larvae]	Y	PredHel=1	1	0	Unknown	Cytoplasmic
933	gi|568326215	53.73	14	5	5	Oxidation (M)	47445	hypothetical protein [Paenibacillus larvae]	Y	PredHel=1	1	0	Unknown	Cytoplasmic
945	gi|738763946	30.35	4	2	2		92593	stage II sporulation protein E [Paenibacillus larvae]	Y	PredHel=7	9	0	CytoplasmicMembrane	Membrane
945	gi|750649120	30.35	5	2	2		77196	stage II sporulation protein E partial [Paenibacillus larvae]	Y	PredHel=5	6	0	CytoplasmicMembrane	Cytoplasmic
945	gi|754755384	30.35	4	2	2		92609	stage II sporulation protein E [Paenibacillus larvae]	Y	PredHel=7	9	0	CytoplasmicMembrane	Membrane
953	gi|985760820	57.04	12	6	2		75768	tail length tape measure protein [Brevibacillus phage Jimmer1]	Y	PredHel=4	5	0	CytoplasmicMembrane	Cytoplasmic
966	gi|568326922	35.88	3	2	2		77709	multidrug resistance ABC transporter ATP-binding/permease YheH [Paenibacillus larvae]	Y	PredHel=5	4	Y	CytoplasmicMembrane	Membrane
966	gi|817691414	35.88	3	2	2		77708	multidrug ABC transporter permease [Paenibacillus larvae]	Y	PredHel=5	4	Y	CytoplasmicMembrane	Membrane
998	gi|558473320	49.55	8	3	3		43380	germination protein [Paenibacillus larvae]	Y	PredHel=0	0	Y	CytoplasmicMembrane	Lipoprotein
1038	gi|568325981	40.85	14	4	4	Carbamidomethylation	52604	two-component sensor histidine kinase [Paenibacillus larvae]	Y	PredHel=2	2	0	CytoplasmicMembrane	Membrane
1038	gi|738761534	40.85	14	4	4	Carbamidomethylation	52586	two-component sensor histidine kinase [Paenibacillus larvae]	Y	PredHel=2	2	0	CytoplasmicMembrane	Membrane
1050	gi|558473561	45.57	14	3	3		26240	DUF421 domain-containing protein [Paenibacillus larvae]	Y	PredHel=3	3	0	CytoplasmicMembrane	Membrane
1050	gi|568326189	45.57	14	3	3		26256	DUF421 domain-containing protein [Paenibacillus larvae]	Y	PredHel=3	3	0	CytoplasmicMembrane	Membrane
1070	gi|738762331	26.32	6	2	2		44704	RND transporter MFP subunit [Paenibacillus larvae]	Y	PredHel=1	1	0	Unknown	Membrane
1086	gi|738762699	38.59	5	2	2	Oxidation (M)	28356	peptidase M15 [Paenibacillus larvae]	Y	PredHel=1	0	Y	CytoplasmicMembrane	Lipoprotein
1099	gi|558473485	36.25	6	2	2		57791	hypothetical protein [Paenibacillus larvae]	Y	PredHel=1	1	0	CytoplasmicMembrane	Membrane
1099	gi|754754286	36.25	6	2	2		57776	ATPase [Paenibacillus larvae]	Y	PredHel=1	1	0	CytoplasmicMembrane	Membrane
1185	gi|568325275	40.82	7	2	2		21012	hypothetical protein [Paenibacillus larvae]	Y	PredHel=2	1	Y	Unknown	Signal
1228	gi|568325174	41.37	12	4	4	Oxidation (M)	69821	two-component sensor histidine kinase [Paenibacillus larvae]	Y	PredHel=2	2	0	CytoplasmicMembrane	Membrane
1229	gi|558475107	41.17	10	4	4	Oxidation (M)	57591	lipoprotein-like protein [Paenibacillus larvae]	Y	PredHel=1	0	Y	Unknown	Lipoprotein
1229	gi|568326351	41.17	10	4	4	Oxidation (M)	57577	lipoprotein-like protein [Paenibacillus larvae]	Y	PredHel=1	0	Y	Unknown	Lipoprotein
1279	gi|738762487	30.7	9	2	2		34160	cell division protein FtsX [Paenibacillus larvae]	Y	PredHel=4	4	0	CytoplasmicMembrane	Membrane
1284	gi|738762067	45.6	14	3	3		28810	hypothetical protein [Paenibacillus larvae]	Y	PredHel=1	0	Y	CytoplasmicMembrane	Signal
1308	gi|558475801	43.45	10	2	2		37491	prolipoprotein diacylglyceryl transferase [Paenibacillus larvae]	Y	PredHel=6	7	0	CytoplasmicMembrane	Membrane
1308	gi|568324433	43.45	10	2	2		37408	prolipoprotein diacylglyceryl transferase [Paenibacillus larvae]	Y	PredHel=6	7	0	CytoplasmicMembrane	Membrane
1320	gi|738762151	43.32	11	2	2	Oxidation (M)	31870	energy-coupling factor transporter ATPase [Paenibacillus larvae]	Y	PredHel=0	0	0	CytoplasmicMembrane	Cytoplasmic	GO:0016020 membrane
1347	gi|738762675	40.59	7	2	2		31130	polysaccharide deacetylase [Paenibacillus larvae]	Y	PredHel=1	1	0	Extracellular	Membrane
1349	gi|738762799	33.79	2	2	2		96757	lysylcardiolipin synthase / lysyltransferase [Paenibacillus larvae]	Y	PredHel=14	13	Y	CytoplasmicMembrane	Membrane
1350	gi|568326166	40.1	6	3	3	Oxidation (M)	32497	type II secretion system protein F [Paenibacillus larvae]	Y	PredHel=4	4	Y	CytoplasmicMembrane	Cytoplasmic
1350	gi|916820825	40.1	6	3	3	Oxidation (M)	32230	hypothetical protein [Paenibacillus larvae]	Y	PredHel=3	3	0	CytoplasmicMembrane	Cytoplasmic
1410	gi|558475770	36.77	5	3	3	Oxidation (M)	110512	tape measure domain-containing protein [Paenibacillus larvae]	Y	PredHel=16	14	0	CytoplasmicMembrane	Cytoplasmic
1417	gi|568324483	46.14	4	4	4	Carbamidomethylation	87041	sensor protein KdpD [Paenibacillus larvae]	Y	PredHel=0	0	0	CytoplasmicMembrane	Cytoplasmic	GO:0016020 membrane
1452	gi|738763820	34.77	8	4	4	Oxidation (M)	70454	hypothetical protein [Paenibacillus larvae]	Y	PredHel=1	1	0	Unknown	Membrane
1452	gi|754754009	34.77	8	4	4	Oxidation (M)	70431	hypothetical protein [Paenibacillus larvae]	Y	PredHel=1	1	0	Unknown	Membrane
1466	gi|754753902	25.53	4	2	2		73826	chemotaxis protein [Paenibacillus larvae]	Y	PredHel=2	2	0	CytoplasmicMembrane	Membrane
1466	gi|817691481	25.53	4	2	2		73899	chemotaxis protein [Paenibacillus larvae]	Y	PredHel=2	2	0	CytoplasmicMembrane	Membrane
1466	gi|918011792	25.53	4	2	2		73913	chemotaxis protein [Paenibacillus larvae]	Y	PredHel=2	2	0	CytoplasmicMembrane	Membrane
1477	gi|568326599	35.51	11	3	3	Oxidation (M)	44053	hypothetical protein [Paenibacillus larvae]	Y	PredHel=2	2	0	CytoplasmicMembrane	Cytoplasmic
1480	gi|738763599	31.76	4	3	3		83843	7TM receptor with intracellular metal dependent phosphohydrolase [Paenibacillus larvae]	Y	PredHel=7	7	0	CytoplasmicMembrane	Membrane
1508	gi|754754596	47.81	4	3	3		85214	hypothetical protein [Paenibacillus larvae]	Y	PredHel=1	1	0	Unknown	Membrane
1508	gi|916820823	47.81	5	3	3		79138	hypothetical protein [Paenibacillus larvae]	Y	PredHel=1	1	0	Unknown	Membrane
1508	gi|918011869	47.81	5	3	3		79078	hypothetical protein [Paenibacillus larvae]	Y	PredHel=1	1	0	Unknown	Membrane
1510	gi|558473824	42.29	5	4	4	Oxidation (M)	103716	membrane carboxypeptidase-like protein [Paenibacillus larvae]	Y	PredHel=1	1	0	CytoplasmicMembrane	Membrane
1510	gi|568325832	42.29	5	4	4	Oxidation (M)	103704	penicillin-binding protein 1A [Paenibacillus larvae]	Y	PredHel=1	1	0	CytoplasmicMembrane	Membrane
1512	gi|568326889	35.81	35	3	3		11856	septum formation initiator [Paenibacillus larvae]	Y	PredHel=1	0	Y	Unknown	Membrane
1567	gi|568324311	35.39	14	3	3		18866	ATP synthase F0 subunit B [Paenibacillus larvae]	Y	PredHel=1	1	0	CytoplasmicMembrane	Membrane
1581	gi|558474063	40.14	8	3	3		47619	glycosyltransferase-like protein associated with biofilm formation [Paenibacillus larvae]	Y	PredHel=4	4	0	CytoplasmicMembrane	Membrane
1610	gi|568325168	40.42	14	4	4		43367	D-alanyl-D-alanine carboxypeptidase [Paenibacillus larvae]	Y	PredHel=1	0	Y	CytoplasmicMembrane	Signal
1615	gi|558475116	30.79	2	2	2	Oxidation (M)	41201	sensor histidine kinase [Paenibacillus larvae]	Y	PredHel=2	2	0	CytoplasmicMembrane	Membrane
1668	gi|558475333	27.9	4	2	2		55374	hypothetical protein [Paenibacillus larvae]	Y	PredHel=13	14	0	CytoplasmicMembrane	Membrane
1668	gi|568325553	27.9	4	2	2		55362	membrane protein [Paenibacillus larvae]	Y	PredHel=13	14	0	CytoplasmicMembrane	Membrane
1694	gi|738762443	26.22	7	1	1		9778	membrane protein [Paenibacillus larvae]	Y	PredHel=2	2	0	CytoplasmicMembrane	Membrane
1782	gi|558473895	28.58	12	2	2		30995	hypothetical protein [Paenibacillus larvae]	Y	PredHel=1	1	0	Unknown	Membrane
1782	gi|568325653	28.58	12	2	2		32748	hypothetical protein [Paenibacillus larvae]	Y	PredHel=1	1	0	Cytoplasmic	Membrane
1836	gi|568326675	39.29	5	2	2		42908	BMP family ABC transporter substrate-binding protein [Paenibacillus larvae]	Y	PredHel=0	1	0	Cytoplasmic	Lipoprotein
1852	gi|754754067	29.1	8	2	2		38154	conjugal transfer protein [Paenibacillus larvae]	Y	PredHel=1	1	0	CytoplasmicMembrane	Membrane
1893	gi|558475605	35.38	7	3	3	Oxidation (M)	44398	glycine/betaine ABC transporter [Paenibacillus larvae]	Y	PredHel=0	0	0	CytoplasmicMembrane	Membrane
1913	gi|916820824	30.51	14	3	3		34899	hypothetical protein [Paenibacillus larvae]	Y	PredHel=1	0	Y	CytoplasmicMembrane	Membrane
1913	gi|918011870	30.51	14	3	3		34943	hypothetical protein [Paenibacillus larvae]	Y	PredHel=1	0	Y	CytoplasmicMembrane	Membrane
1922	gi|558473380	42.54	11	3	3	Carbamidomethylation	43572	D-alanyl-D-alanine carboxypeptidase [Paenibacillus larvae]	Y	PredHel=0	0	Y	CytoplasmicMembrane	Signal
1971	gi|916820743	29.25	11	2	2		31524	DNA processing protein DprA [Paenibacillus larvae]	Y	PredHel=1	1	0	Cytoplasmic	Cytoplasmic
1974	gi|558475404	26.21	2	2	2		97977	magnesium-translocating P-type ATPase [Paenibacillus larvae]	Y	PredHel=8	8	0	CytoplasmicMembrane	Cytoplasmic
1974	gi|568325593	26.21	2	2	2		97917	magnesium-translocating P-type ATPase [Paenibacillus larvae]	Y	PredHel=8	8	0	CytoplasmicMembrane	Cytoplasmic
2007	gi|738762782	35.3	8	3	3		54432	hypothetical protein [Paenibacillus larvae]	Y	PredHel=1	1	0	CytoplasmicMembrane	Cytoplasmic
2011	gi|916820973	31.86	2	2	2		71002	DNA internalization-related competence protein ComEC/Rec2 [Paenibacillus larvae]	Y	PredHel=8	9	0	CytoplasmicMembrane	Cytoplasmic
2011	gi|918159621	31.86	2	2	2		70232	DNA internalization-related competence protein ComEC/Rec2 [Paenibacillus larvae]	Y	PredHel=8	9	0	CytoplasmicMembrane	Cytoplasmic
2028	gi|754753736	30.72	4	3	3		77107	membrane protein [Paenibacillus larvae]	Y	PredHel=9	9	0	CytoplasmicMembrane	Cytoplasmic
2028	gi|817691522	30.72	4	3	3		77106	membrane protein [Paenibacillus larvae]	Y	PredHel=9	9	0	CytoplasmicMembrane	Cytoplasmic
2030	gi|558473270	37.3	6	2	2		51206	fructose amino acid-binding lipoprotein-like protein [Paenibacillus larvae]	Y	PredHel=0	0	Y	CytoplasmicMembrane	Lipoprotein
2057	gi|558475151	37.28	14	2	2		22574	signal peptidase I [Paenibacillus larvae]	Y	PredHel=1	1	0	CytoplasmicMembrane	Membrane
2079	gi|738764997	38.87	5	3	3		63221	hypothetical protein [Paenibacillus larvae]	Y	PredHel=2	2	0	CytoplasmicMembrane	Membrane
2079	gi|918159676	38.87	5	3	3		71972	two-component sensor histidine kinase [Paenibacillus larvae]	Y	PredHel=2	2	0	CytoplasmicMembrane	Membrane
2089	gi|738765228	27.68	6	2	2		48402	SpoIVB peptidase [Paenibacillus larvae]	Y	PredHel=1	0	Y	Cytoplasmic	Membrane
2189	gi|558476389	25.47	4	2	2		83831	penicillin-binding protein [Paenibacillus larvae]	Y	PredHel=1	0	Y	CytoplasmicMembrane	Membrane
2189	gi|568325945	25.47	4	2	2		83817	penicillin-binding protein 2B [Paenibacillus larvae]	Y	PredHel=1	0	Y	CytoplasmicMembrane	Membrane
2189	gi|738761506	25.47	4	2	2		83847	hypothetical protein [Paenibacillus larvae]	Y	PredHel=1	0	Y	CytoplasmicMembrane	Membrane
2200	gi|738764807	35.51	6	2	2		35552	manganese transporter [Paenibacillus larvae]	Y	PredHel=1	0	Y	CytoplasmicMembrane	Lipoprotein
2217	gi|568326328	39.28	3	2	2		73122	methyl-accepting chemotaxis protein McpC [Paenibacillus larvae]	Y	PredHel=2	2	0	CytoplasmicMembrane	Membrane
2217	gi|738761614	39.28	5	2	2		41401	methyl-accepting chemotaxis protein [Paenibacillus larvae]	Y	PredHel=1	0	Y	CytoplasmicMembrane	Membrane
2228	gi|558473177	30.09	4	2	2		68577	PAS domain-containing sensor histidine kinase [Paenibacillus larvae]	Y	PredHel=2	2	0	CytoplasmicMembrane	Membrane
2230	gi|558474421	25.63	2	2	2		94409	hypothetical protein [Paenibacillus larvae]	Y	PredHel=8	7	Y	CytoplasmicMembrane	Membrane
2230	gi|568326019	25.63	2	2	2		95151	hypothetical protein [Paenibacillus larvae]	Y	PredHel=8	7	Y	CytoplasmicMembrane	Membrane
2291	gi|558476022	23.44	4	2	2		75221	hypothetical protein [Paenibacillus larvae]	Y	PredHel=1	1	0	Unknown	Membrane
2295	gi|754754327	25.24	11	2	2		43724	chitin-binding protein [Paenibacillus larvae]	Y	PredHel=1	1	0	Unknown	Membrane
2295	gi|817691540	25.24	9	2	2		53694	hypothetical protein [Paenibacillus larvae]	Y	PredHel=1	1	0	Unknown	Membrane
2301	gi|558475483	24.35	9	2	2		46237	RIP metalloprotease RseP [Paenibacillus larvae]	Y	PredHel=4	3	0	CytoplasmicMembrane	Cytoplasmic
2322	gi|738765158	35.89	6	2	2		36836	ABC transporter permease [Paenibacillus larvae]	Y	PredHel=6	6	0	CytoplasmicMembrane	Membrane
2332	gi|918159582	29.85	7	2	2		61712	HAMP domain-containing protein [Paenibacillus larvae]	Y	PredHel=2	2	0	CytoplasmicMembrane	Cytoplasmic
2338	gi|738762554	27.56	6	2	2		34571	ABC transporter ATP-binding protein [Paenibacillus larvae]	Y	PredHel=0	0	0	CytoplasmicMembrane	Membrane
2342	gi|558473364	22.65	5	1	1		37382	LytR family transcriptional regulator [Paenibacillus larvae]	Y	PredHel=1	1	0	CytoplasmicMembrane	Membrane
2369	gi|558473217	34.17	4	2	2		57414	hypothetical protein [Paenibacillus larvae]	Y	PredHel=3	3	0	CytoplasmicMembrane	Cytoplasmic
2391	gi|568325465	31.54	4	2	2		72065	hypothetical protein [Paenibacillus larvae]	Y	PredHel=1	0	Y	Unknown	Membrane
2391	gi|738761029	31.54	4	2	2		71978	hypothetical protein [Paenibacillus larvae]	Y	PredHel=1	0	Y	Unknown	Membrane
2395	gi|568326949	27.68	6	2	2		46862	oxygen sensor histidine kinase NreB [Paenibacillus larvae]	Y	PredHel=2	2	0	CytoplasmicMembrane	Membrane
2395	gi|918011903	27.68	6	2	2		46763	hypothetical protein [Paenibacillus larvae]	Y	PredHel=2	2	0	CytoplasmicMembrane	Membrane
2403	gi|558475020	29.8	5	2	2		50227	amino acid permease-like protein [Paenibacillus larvae]	Y	PredHel=12	12	0	CytoplasmicMembrane	Membrane
2403	gi|568325467	29.8	5	2	2		50243	amino acid permease YtnA [Paenibacillus larvae]	Y	PredHel=12	12	0	CytoplasmicMembrane	Membrane
2426	gi|558475014	23.94	4	2	2		68279	glycerophosphodiester phosphodiesterase-like protein [Paenibacillus larvae]	Y	PredHel=7	7	0	CytoplasmicMembrane	Membrane
2449	gi|754754436	25.8	9	2	2	Oxidation (M)	34607	paraslipin [Paenibacillus larvae]	Y	PredHel=1	0	Y	Cytoplasmic	Membrane
2468	gi|558475219	25.72	2	2	2		73824	sodium/hydrogen antiporter-like protein [Paenibacillus larvae]	Y	PredHel=9	10	0	CytoplasmicMembrane	Membrane
2468	gi|568326390	25.72	2	2	2		77176	sodium/proton antiporter CPA1 family [Paenibacillus larvae]	Y	PredHel=12	10	Y	CytoplasmicMembrane	Membrane
2468	gi|817691604	25.72	2	2	2		77218	hypothetical protein [Paenibacillus larvae]	Y	PredHel=12	10	Y	CytoplasmicMembrane	Membrane
2514	gi|568325259	32.46	8	2	2		42273	hypothetical protein [Paenibacillus larvae]	Y	PredHel=6	6	0	CytoplasmicMembrane	Membrane
2563	gi|568326637	33.34	7	2	2		57122	sensor histidine kinase [Paenibacillus larvae]	Y	PredHel=2	2	0	CytoplasmicMembrane	Membrane
2567	gi|919197473	26.84	3	2	1	Oxidation (M)	93387	phage tail tape measure protein [Paenibacillus larvae]	Y	PredHel=2	2	0	CytoplasmicMembrane	Cytoplasmic
2582	gi|568324646	30.56	10	2	2		29000	FAD-dependent glycine oxidase-like protein [Paenibacillus larvae]	Y	PredHel=1	1	0	Cytoplasmic	Cytoplasmic
2604	gi|568325838	29.7	5	2	2	Oxidation (M)	69148	PTS glucosamine transporter subunit EIICBA GamP [Paenibacillus larvae]	Y	PredHel=8	9	Y	CytoplasmicMembrane	Membrane
2604	gi|738765523	29.7	5	2	2	Oxidation (M)	69118	PTS glucose transporter subunit IIA [Paenibacillus larvae]	Y	PredHel=8	9	Y	CytoplasmicMembrane	Membrane
2723	gi|738764619	25.02	11	2	2		33392	membrane protein [Paenibacillus larvae]	Y	PredHel=3	3	0	CytoplasmicMembrane	Membrane
2723	gi|754754265	25.02	12	2	2		32788	membrane protein [Paenibacillus larvae]	Y	PredHel=3	3	0	CytoplasmicMembrane	Membrane
2737	gi|568324394	29.2	5	2	2		46229	peptidase M23 family [Paenibacillus larvae]	Y	PredHel=1	1	0	Extracellular	Membrane
2737	gi|916820902	29.2	5	2	2		46301	hypothetical protein [Paenibacillus larvae]	Y	PredHel=1	1	0	Extracellular	Membrane
2742	gi|568324322	27.88	4	2	2		67905	NADH-quinone oxidoreductase subunit L [Paenibacillus larvae]	Y	PredHel=16	16	0	CytoplasmicMembrane	Membrane
2742	gi|738762442	27.88	4	2	2		67875	NADH-quinone oxidoreductase subunit L [Paenibacillus larvae]	Y	PredHel=16	16	0	CytoplasmicMembrane	Membrane
2750	gi|558473123	24.85	5	2	2	Oxidation (M)	48663	hypothetical protein [Paenibacillus larvae]	Y	PredHel=12	11	Y	CytoplasmicMembrane	Membrane
2750	gi|568326961	24.85	5	2	2	Oxidation (M)	48675	anaerobic C4-dicarboxylate transporter DcuC [Paenibacillus larvae]	Y	PredHel=12	11	Y	CytoplasmicMembrane	Membrane
2805	gi|738762044	24.61	9	2	2		33665	glycine/betaine ABC transporter substrate-binding protein [Paenibacillus larvae]	Y	PredHel=0	0	Y	CytoplasmicMembrane	Lipoprotein
2839	gi|568325932	33.8	24	2	2	Oxidation (M)	12328	hypothetical protein [Paenibacillus larvae]	Y	PredHel=1	1	0	Cytoplasmic	Membrane
2896	gi|916820878	26.23	7	2	2		31592	inositol phosphorylceramide synthase [Paenibacillus larvae]	Y	PredHel=4	6	0	CytoplasmicMembrane	Cytoplasmic
2896	gi|918159605	26.23	7	2	2		32170	inositol phosphorylceramide synthase [Paenibacillus larvae]	Y	PredHel=4	6	0	CytoplasmicMembrane	Cytoplasmic
2921	gi|558473464	37.6	7	2	2	Oxidation (M)	31852	hypothetical protein [Paenibacillus larvae]	Y	PredHel=2	2	0	CytoplasmicMembrane	Lipoprotein
2938	gi|558476341	39.03	3	2	2		36951	hypothetical protein [Paenibacillus larvae]	Y	PredHel=9	9	0	CytoplasmicMembrane	Membrane
2938	gi|750649647	39.03	4	2	2		27670	iron ABC transporter permease partial [Paenibacillus larvae]	Y	PredHel=6	6	0	CytoplasmicMembrane	Membrane
NOTE: "Protein group" refers to the proteins identified by a common set of peptides; "Accession number" is the unique number given to mark the entry of a protein in the database of NCBInr; " -10lgP" is a conversion of P-value, by which a more significant match will have a higher -10lgP value; "Coverage" is the ratio of the number of amino acids in peptides that yield by experimental mass spectra …
